# Supplementary material for: Coexistence of topological node surface and Dirac fermions in phonon-mediated superconductor YB2C2
Source: Royal Society of Chemistry journal article supplement (doi:10.1039/d3cp03678b), 2023-11-14
Supplement: d3cp03678b1.pdf [file d3cp03678b1.pdf]

## Supplementary Material

### Coexistence of topological node surface and Dirac fermions in phonon-mediated superconductor $\text{YB}_2\text{C}_2$

Siqi Wang,<sup>a</sup> Mingmin Zhong,<sup>a\*</sup> Haibo Liu,<sup>a</sup> and Meng Ju<sup>a</sup>

<sup>a</sup>School of Physical Science and Technology, Southwest University, Chongqing  
400715, China

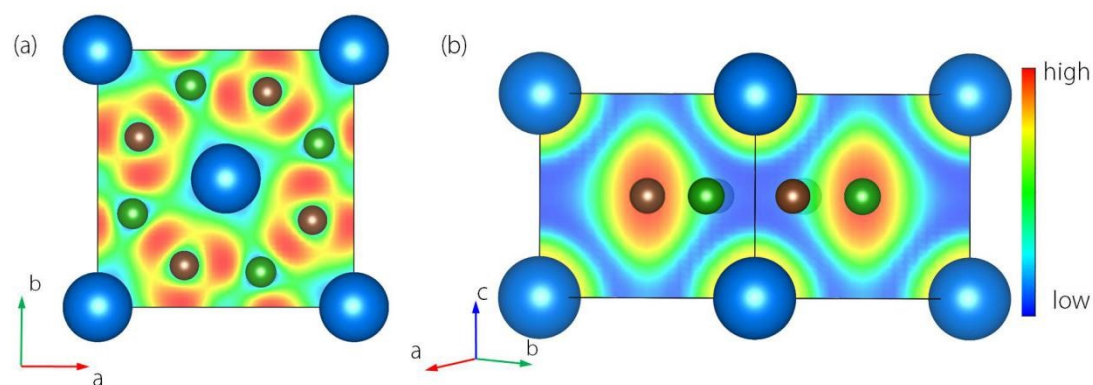

Fig. S1 Different electron localization function planes of  $\text{YB}_2\text{C}_2$ .

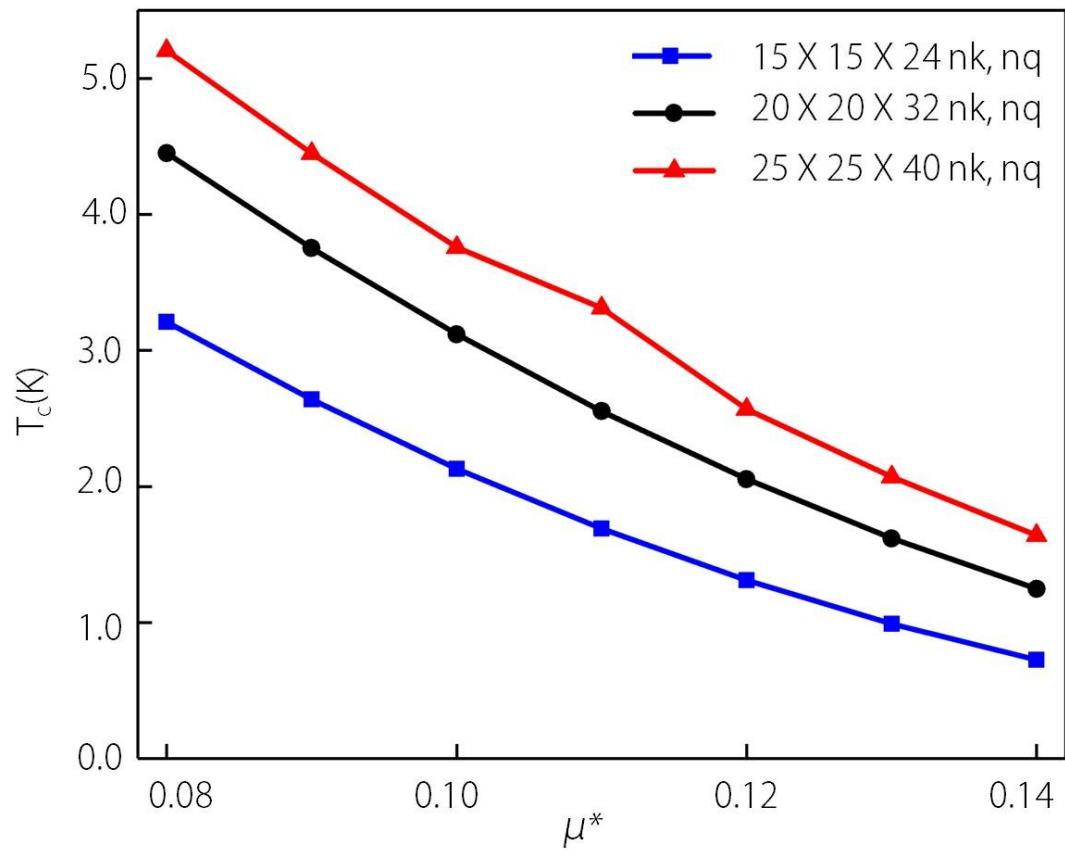

Fig. S2  $T_c$  as a function of Coulomb pseudopotential parameter  $\mu^*$  with different k mesh and q mesh interpolated by Wannier functions.
